# Supplementary material
Source: PubMed Central journal article supplement (PMC6054564)

Supplementary Table 1: Univariable linear regression analysis for bile acids associated with bilirubin

| Simple linear regression with predictor variables |          |          |                      |                |
|---------------------------------------------------|----------|----------|----------------------|----------------|
| Variable <sup>a</sup>                             | B        | SE       | p-value <sup>b</sup> | R <sup>2</sup> |
| <b>Total BA (abs.)</b>                            | 0.05002  | 0.01536  | <b>0.003</b>         | 0.261          |
| <b>Conj. BA (abs.)</b>                            | 0.04995  | 0.01540  | <b>0.003</b>         | 0.260          |
| <b>Unconj. BA (abs.)</b>                          | 0.8578   | 1.1308   | 0.454                | 0.019          |
| <b>Conj. BA</b>                                   | 41.703   | 9.034    | <b>&lt;0.001</b>     | 0.415          |
| <b>Unconj. BA</b>                                 | -41.703  | 9.034    | <b>&lt;0.001</b>     | 0.415          |
| <b>Conj./Unconj. BA</b>                           | 0.0130   | 0.004699 | <b>0.010</b>         | 0.203          |
| <b>T-BA</b>                                       | 45.019   | 5.640    | <b>&lt;0.001</b>     | 0.680          |
| <b>G-BA</b>                                       | -18.270  | 10.357   | 0.088                | 0.094          |
| <b>CDCA</b>                                       | -103.334 | 29.364   | <b>0.001</b>         | 0.292          |
| <b>CA</b>                                         | -214.597 | 62.428   | <b>0.002</b>         | 0.283          |
| <b>DCA</b>                                        | -70.161  | 18.481   | <b>&lt;0.001</b>     | 0.325          |
| <b>HDCA</b>                                       | -288.234 | 141.664  | 0.054                | 0.153          |
| <b>T-CDCA</b>                                     | 77.694   | 8.668    | <b>&lt;0.001</b>     | 0.728          |
| <b>T-CA</b>                                       | 69.714   | 11.900   | <b>&lt;0.001</b>     | 0.534          |
| <b>T-DCA</b>                                      | -148.855 | 53.624   | <b>0.009</b>         | 0.204          |
| <b>T-LCA</b>                                      | -145.825 | 84.421   | 0.094                | 0.090          |
| <b>G-CDCA</b>                                     | -9.410   | 11.707   | 0.428                | 0.021          |
| <b>G-CA</b>                                       | 59.57198 | 27.17167 | <b>0.036</b>         | 0.138          |
| <b>G-DCA</b>                                      | -105.897 | 22.170   | <b>&lt;0.001</b>     | 0.432          |
| <b>G-UDCA</b>                                     | -42.897  | 46.300   | 0.362                | 0.028          |
| <b>Conj. CDCA</b>                                 | 23.142   | 9.504    | <b>0.021</b>         | 0.165          |
| <b>Conj. CA</b>                                   | 44.065   | 9.087    | <b>&lt;0.001</b>     | 0.440          |
| <b>Conj. DCA</b>                                  | -78.68   | 16.57    | <b>&lt;0.001</b>     | 0.429          |

Notes:

<sup>a</sup>Bile acids (BA) are expressed as percent from total BA, except for “Total BA (abs.)”, “Conj. BA (abs.)” and “Unconj. BA (abs.)”; these are expressed as absolute (abs.) values.

<sup>b</sup>Significance is indicated in bold.

Abbreviations:

B=non-standardized regression coefficient, SE=Standard Error, R<sup>2</sup>=coefficient of determination

BA, bile acid; CA, cholic acid; CDCA, chenodeoxycholic acid; conj., conjugated; DCA, deoxycholic acid G-BA, glycine-conjugated bile acid; G-CA, glycocholic acid; G-CDCA, glyco-chenodeoxycholic acid; G-DCA, glyco-deoxycholic acid; GUDCA, glyco-ursodeoxycholic acid, HDCA, hyodeoxycholic acid; MELD, Model for End-stage Liver Disease; T-BA, taurine-conjugated bile acid; T-CA, tauro-cholic acid; T-CDCA, tauro-chenodeoxycholic acid; T-DCA, tauro-deoxycholic acid; T-LCA, tauro-lithocholic acid; unconj., unconjugated.

# Supplementary Figure 1

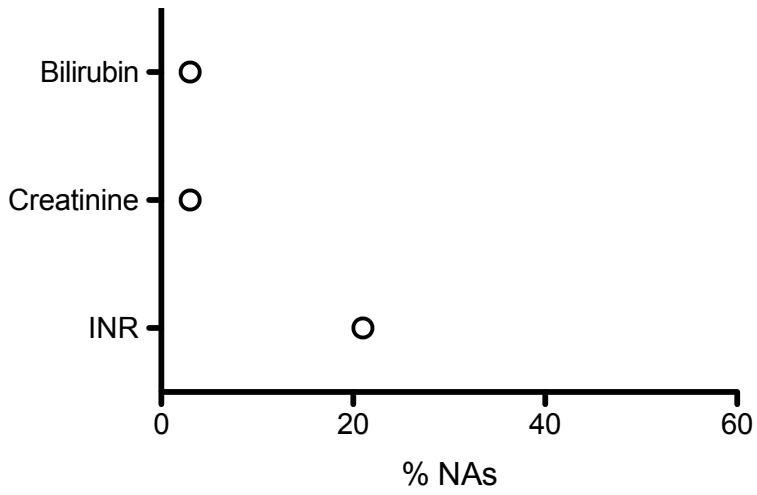

# Supplementary Figure 2

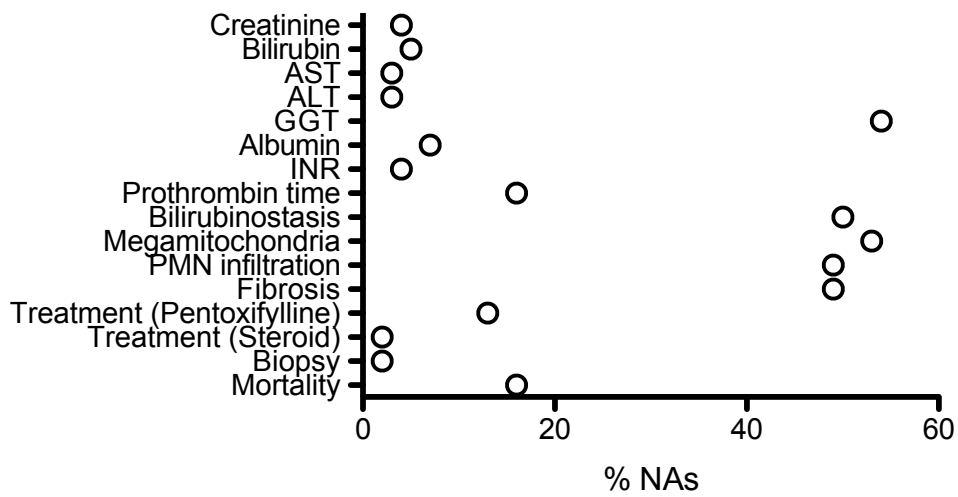

Supplement: NIHMS959236-supplement.pdf [file NIHMS959236-supplement.pdf]
